# Supplementary material for: A rhodamine based chemodosimeter for the detection of Group 13 metal ions
Source: Royal Society of Chemistry journal article supplement (doi:10.1039/d2ay01701f), 2022-11-15
Supplement: d2ay01701f1.pdf [file d2ay01701f1.pdf]

**A rhodamine based chemodosimeter for the detection of Group 13 metal ions**

Sneha Ghosh and Partha Roy\*

Department of Chemistry, Jadavpur University, Jadavpur, Kolkata 700032, India

E-mail address: partha.roy@jadavpuruniversity.in (P. Roy)

## Experimental Section

### Material & physical measurements

Rhodamine 6G, trans cinnamaldehyde, nitrates of  $\text{Al}^{3+}$ ,  $\text{Cr}^{3+}$ ,  $\text{Ga}^{3+}$ ,  $\text{In}^{3+}$ ,  $\text{Fe}^{3+}$ ,  $\text{Tl}^{3+}$ ,  $\text{Zn}^{2+}$ ,  $\text{Ni}^{2+}$ ,  $\text{Hg}^{2+}$ ,  $\text{Cu}^{2+}$ ,  $\text{Cd}^{2+}$ , etc. were procured from Sigma Aldrich and used as received. All other reagents for synthesis or measurements were obtained from commercial sources and used them as received. N-(rhodamine-6G)lactam-ethylenediamine ( $\text{L}_1$ ) has been synthesized following a published method [S1]. Solvents for obtaining different spectra were purified and dried by following published methods before use [S2]. FT-IR spectra of HL-CIN and HL-CIN with different Group 13 metal ions were recorded by ATR technique on a Perkin Elmer spectrometer (Spectrum Two). Elemental analysis of the probe and its metal complexes was performed on a 2400 Perkin Elmer Series-II CHN analyzer.  $^1\text{H}$  and  $^{13}\text{C}$  NMR spectra of HL-CIN and HL-CIN with different Group 13 metal ions were obtained on a Bruker 300 MHz spectrometer with tetramethylsilane ( $\delta = 0$ ) as the internal standard. The ESI-MS spectra of HL-CIN and HL-CIN with different Group 13 metal ions were recorded in methanol on Qtof Micro YA263 mass spectrometer. Absorption spectra of HL-CIN and HL-CIN with different Group 13 and other relevant metal ions were obtained with a Shimadzu UV 1900 spectrophotometer whereas the corresponding emission spectra were measured on a Horiba Duetta Fluorescence and Absorbance Spectrometer. Luminescence lifetime measurements of HL-CIN and HL-CIN with different Group 13 metal ions were performed using a TCSPC setup from Horiba Jobin Yvon. The luminescence decay data collection was done on a Hamamatsu MCP photomultiplier (R3809) and the data were processed using the IBH DAS6 software.

Emission quantum yields ( $\Phi$ ) of HL-CIN and HL-CIN with different Group 13 metal ions were determined by using the following formula:

$$\Phi_{\text{sample}} = \left[ \frac{(\text{OD}_{\text{standard}} \times A_{\text{sample}} \times \eta_{\text{sample}}^2)}{(\text{OD}_{\text{sample}} \times A_{\text{standard}} \times \eta_{\text{standard}}^2)} \right] \times \Phi_{\text{standard}}$$

where OD is the optical density of HL-CIN and HL-CIN with different Group 13 metal ions at the excitation wavelength i.e. 495 nm, A represents the area under the fluorescence emission curve, and  $\eta$  is the refractive index of the media in which spectra were recorded. Rhodamine- 6G is considered as the standard to determine the quantum yields (quantum yield of Rhodamine- 6G is 0.94 in ethanol) [S3].

### Fluorescence and UV-vis spectral experiments

The absorption and fluorescence spectra of *HL-CIN* were obtained in absence and in the presence of different metal ions in 10 mM HEPES buffer in  $\text{H}_2\text{O}/\text{ethanol} = 1:9$  (v/v) (pH 7.4) at room temperature. Generally, nitrate salts of different metal ions were used in the spectral measurements where concentration of the probe was fixed as 40  $\mu\text{M}$  and concentrations of different metal ions were varied. Excitation wavelength for fluorescence measurement was 495 nm.

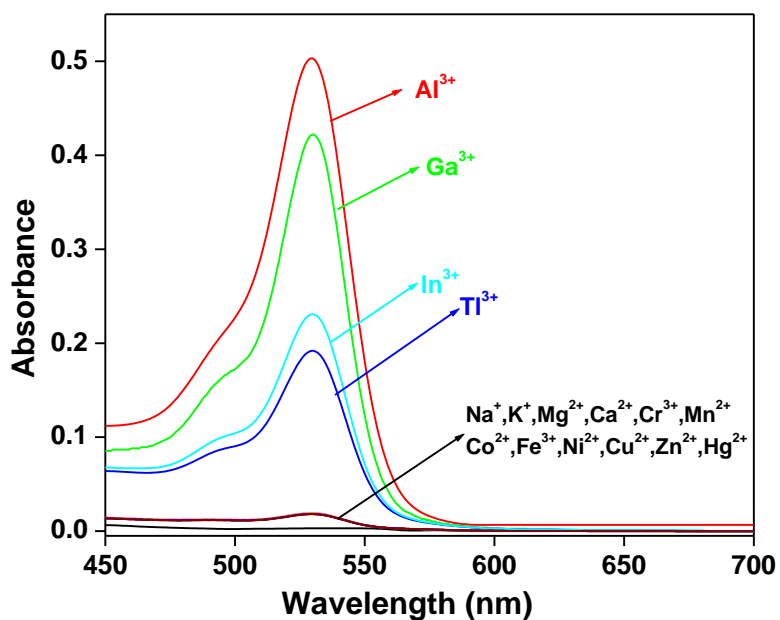

**Fig. S1** Absorption spectra of HL-CIN (40  $\mu\text{M}$ ) in the presence of 40  $\mu\text{M}$  of different metal ions in 10 mM HEPES buffer in  $\text{H}_2\text{O}/\text{ethanol} = 1:9$  (v/v; pH = 7.4) at room temperature.

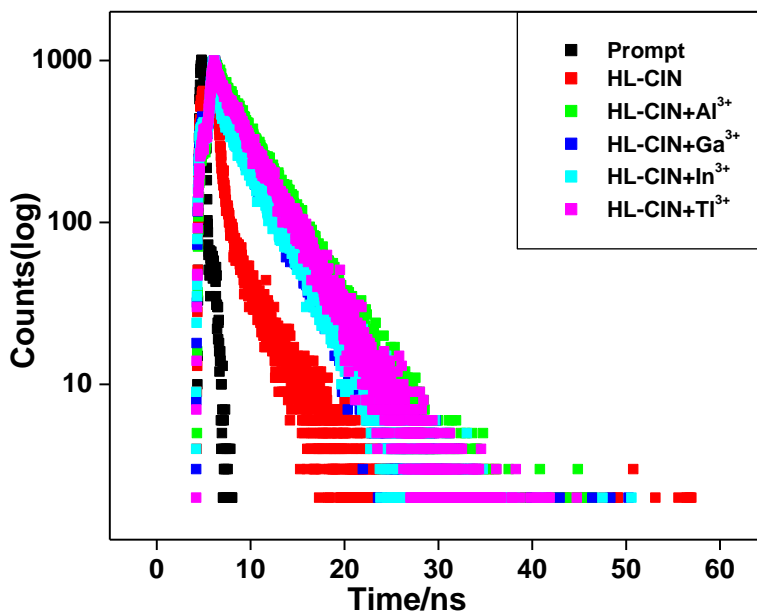

**Fig. S2** Excited state fluorescence decay behavior of HL-CIN and HL-CIN in the presence of  $\text{Al}^{3+}$ ,  $\text{Ga}^{3+}$ ,  $\text{In}^{3+}$  and  $\text{Tl}^{3+}$  in 10 mM HEPES buffer in  $\text{H}_2\text{O}/\text{CH}_3\text{OH} = 1:9$  (v/v; pH = 7.4) at room temperature.

### Determination of LOD of HL-CIN for $\text{Al}^{3+}$ , $\text{Ga}^{3+}$ , $\text{In}^{3+}$ and $\text{Tl}^{3+}$

Limit of detection (LOD) for HL-CIN has been determined by  $3\sigma$  method [S4] by following equation:

$$\text{LOD} = K \cdot \text{Sb1} / S$$

where  $K = 2$  or  $3$  ( $3$  in this case); here  $\text{Sb1}$  is the standard deviation of the blank solution; and  $S$  is the slope of the calibration curve obtained from Linear dynamic plot of Fluorescence Intensity vs  $[\text{metal ion}] M$ .

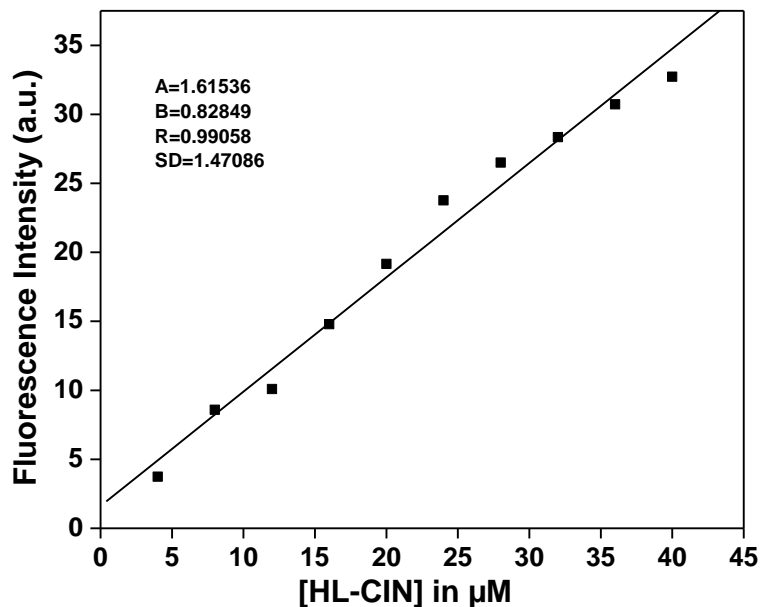

Fig. S3 Determination of  $\text{Sb1}$  of the blank, HL-CIN solution.

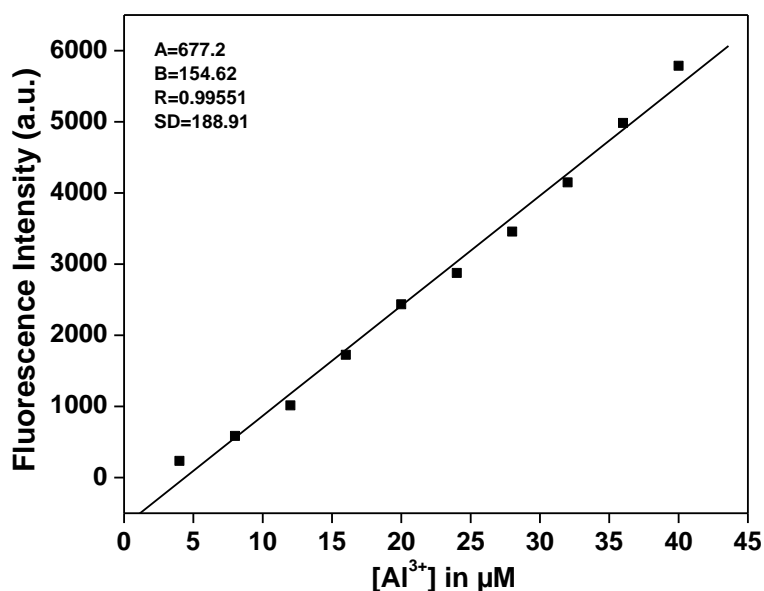

Fig. S4 Linear dynamic plot of Fluorescence Intensity vs.  $[\text{Al}^{3+}]$  for the determination of  $S$  (slope);  $[\text{HL-CIN}] = 40 \mu\text{M}$

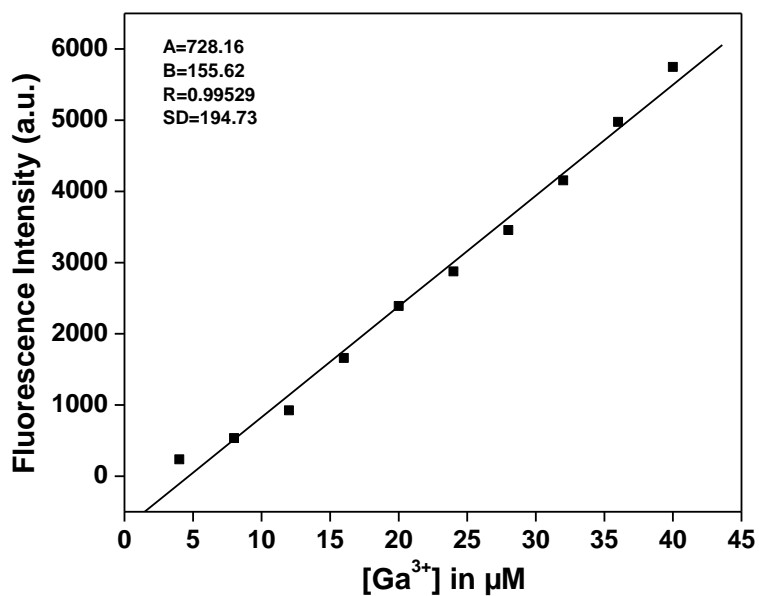

**Fig. S5** Linear dynamic plot of Fluorescence Intensity vs.  $[Ga^{3+}]$  for the determination of S (slope);  $[HL-CIN] = 40 \mu M$

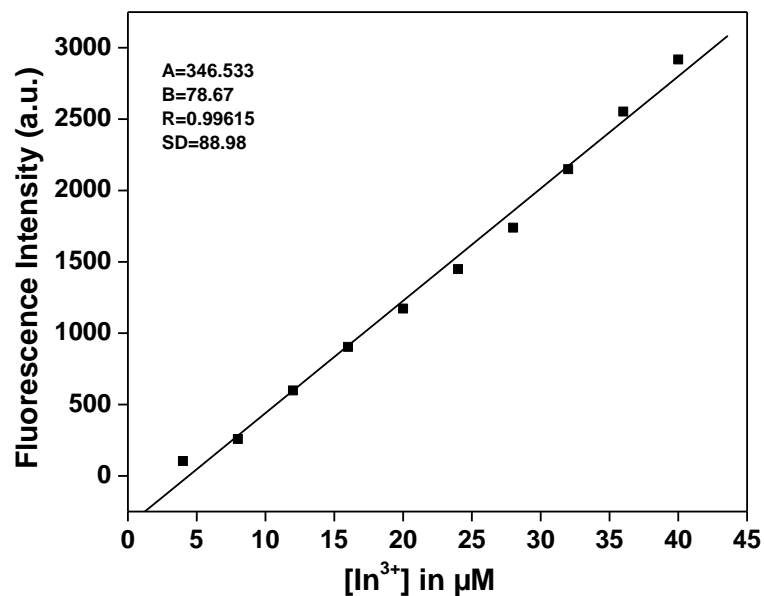

**Fig. S6** Linear dynamic plot of Fluorescence Intensity vs.  $[In^{3+}]$  for the determination of S (slope);  $[HL-CIN] = 40 \mu M$

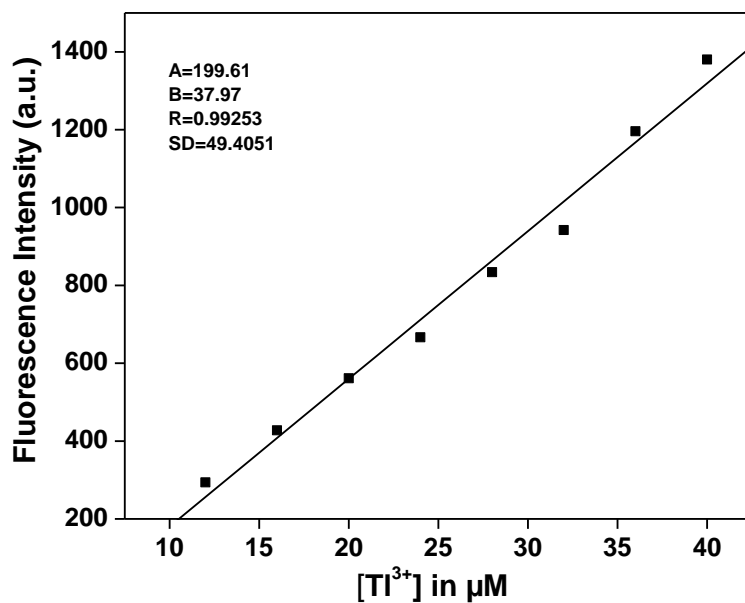

**Fig. S7** Linear dynamic plot of Fluorescence Intensity vs. [Ti<sup>3+</sup>] for the determination of S (slope); [HL-CIN] = 40 μM

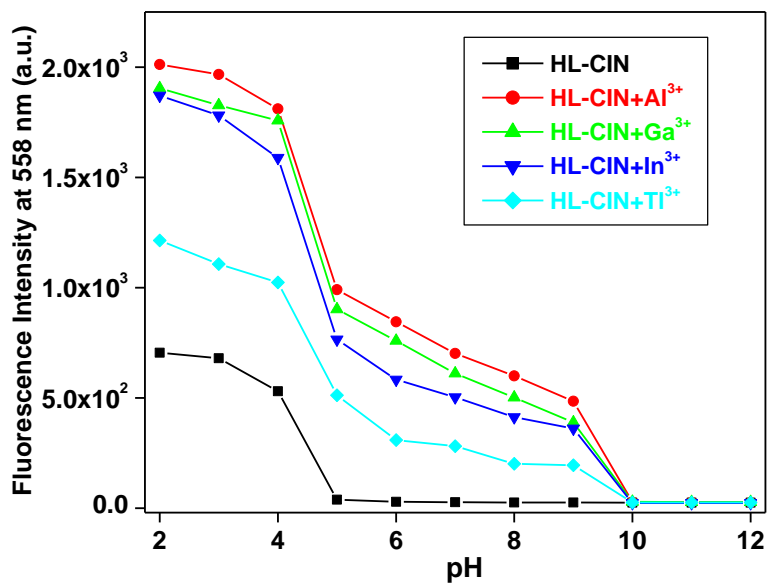

**Fig. S8** Fluorescence intensity of HL-CIN (40 μM) and HL-CIN in the presence of one equivalent of Al<sup>3+</sup>, Ga<sup>3+</sup>, In<sup>3+</sup> and Ti<sup>3+</sup> at different pH.

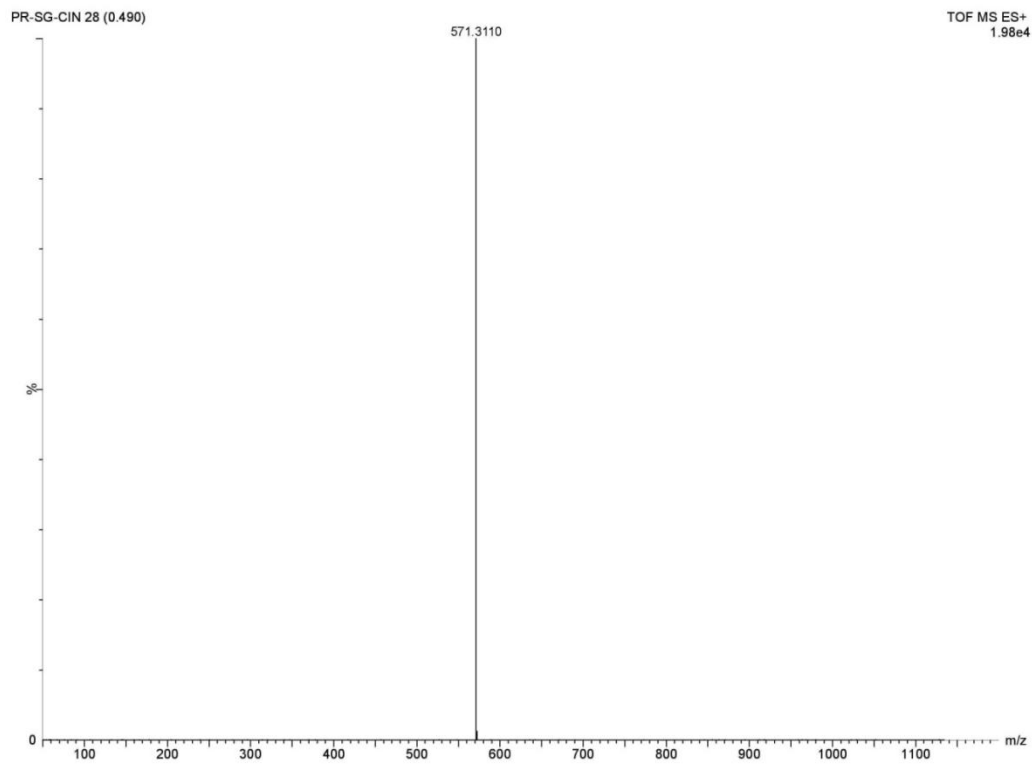

**Fig. S9** ESI mass spectrum of HL-CIN in methanol.

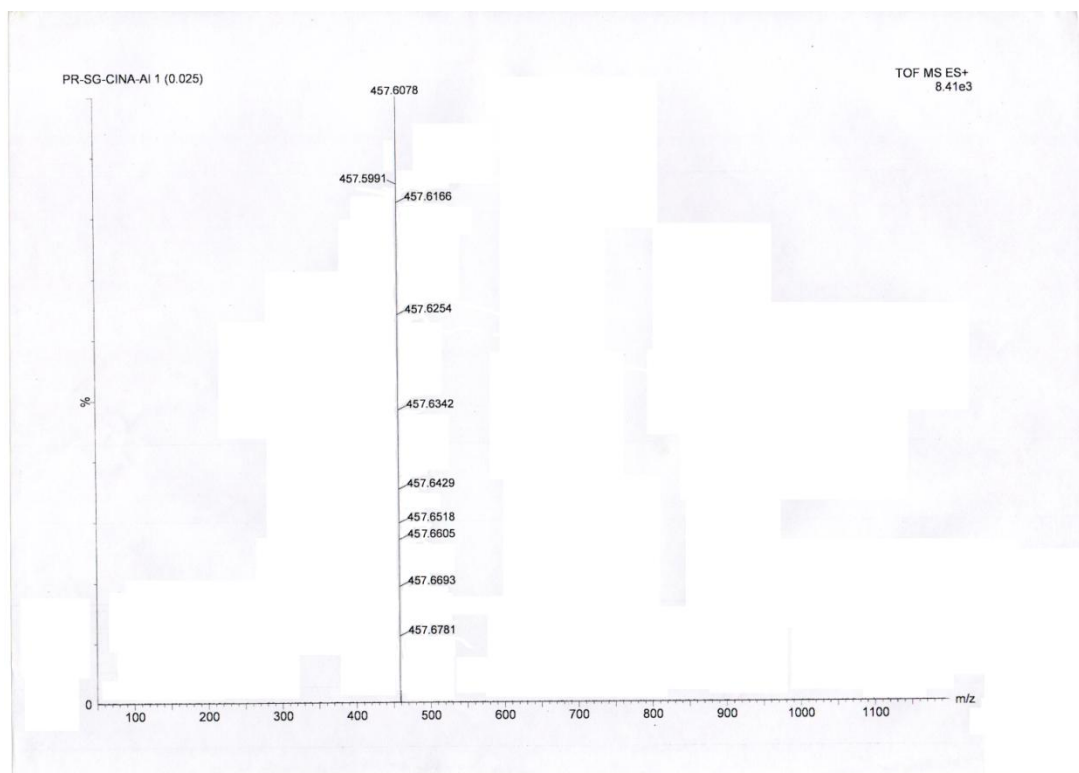

**Fig. S10** ESI mass spectrum of HL-CIN in the presence of  $\text{Al}^{3+}$  in methanol.

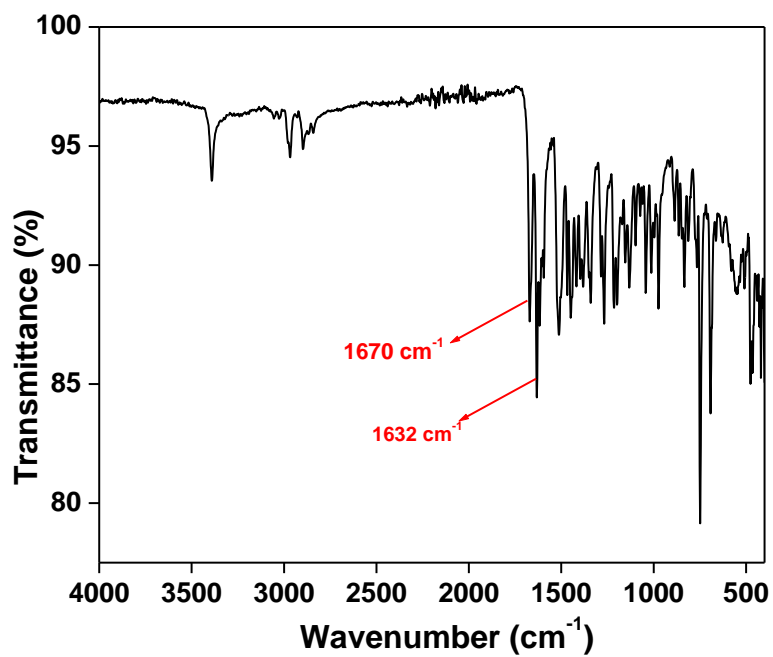

Fig. S11 FT-IR spectrum of HL-CIN.

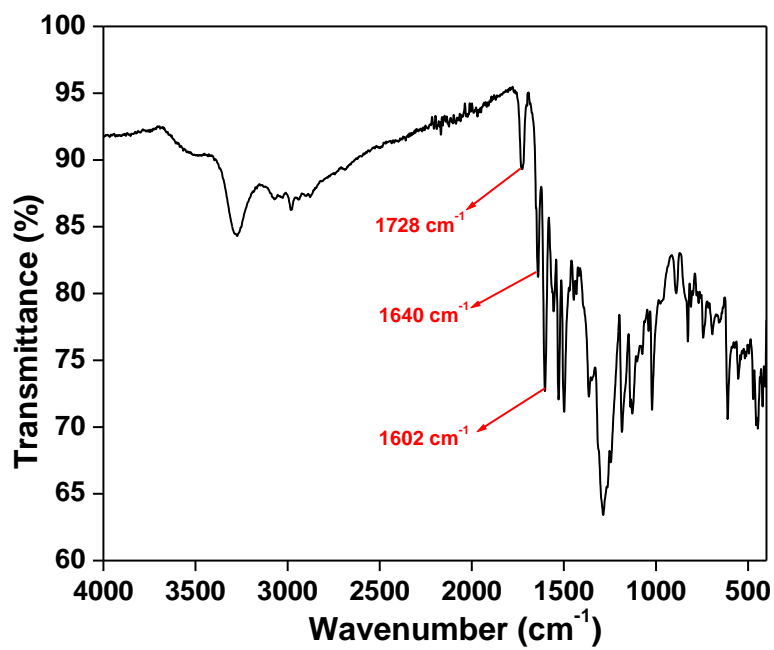

Fig. S12 FT-IR spectrum of HL-CIN in the presence of Al<sup>3+</sup>.



PR(I)SG-ALD  
PR(I)SG-ALD-1H

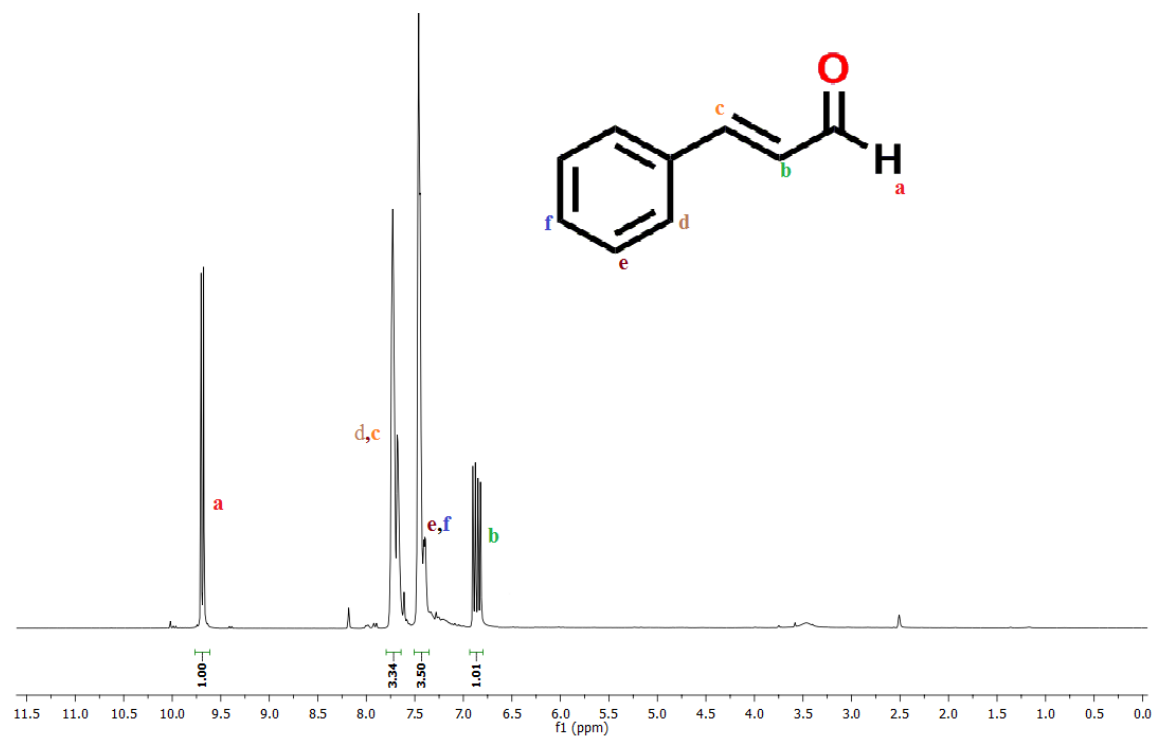

Fig. S13 <sup>1</sup>H NMR spectra of *trans* cinnamaldehyde in DMSO-d<sub>6</sub>.

PR(I)-DB-Rho  
PR(I)-DB-Rho-1H

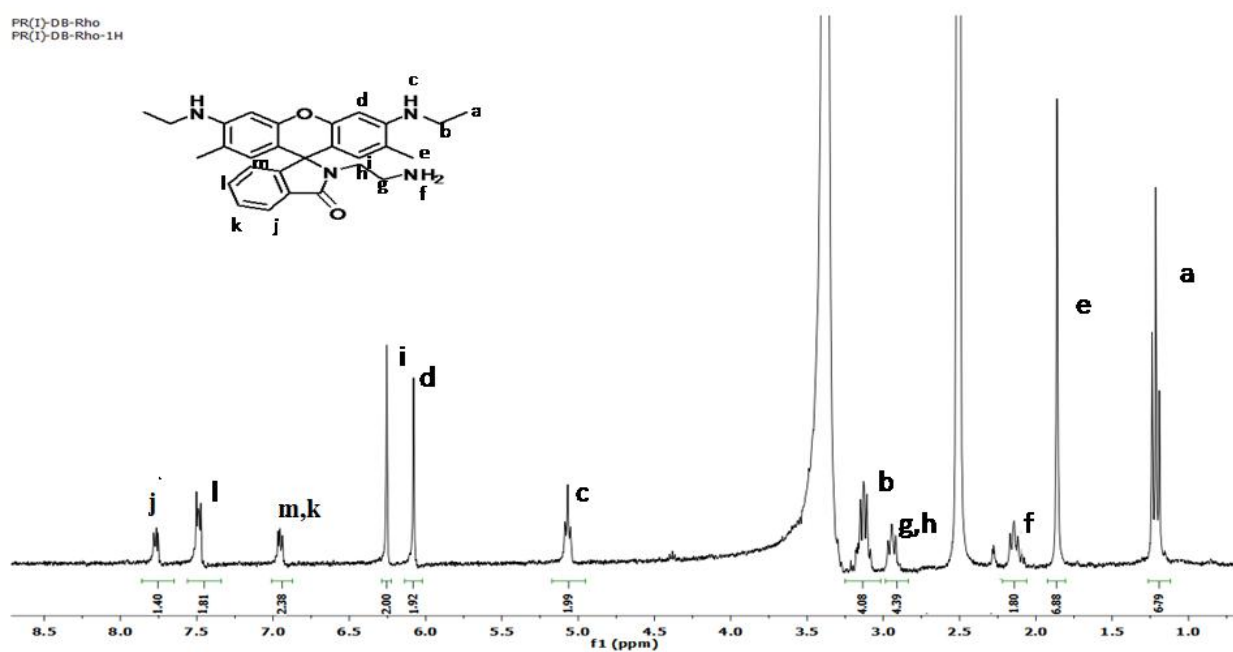

Fig. S14 <sup>1</sup>H NMR spectra of L<sub>1</sub> in DMSO-d<sub>6</sub>.

PR(1)SG-OGa  
PR(1)SG-OGa-1H

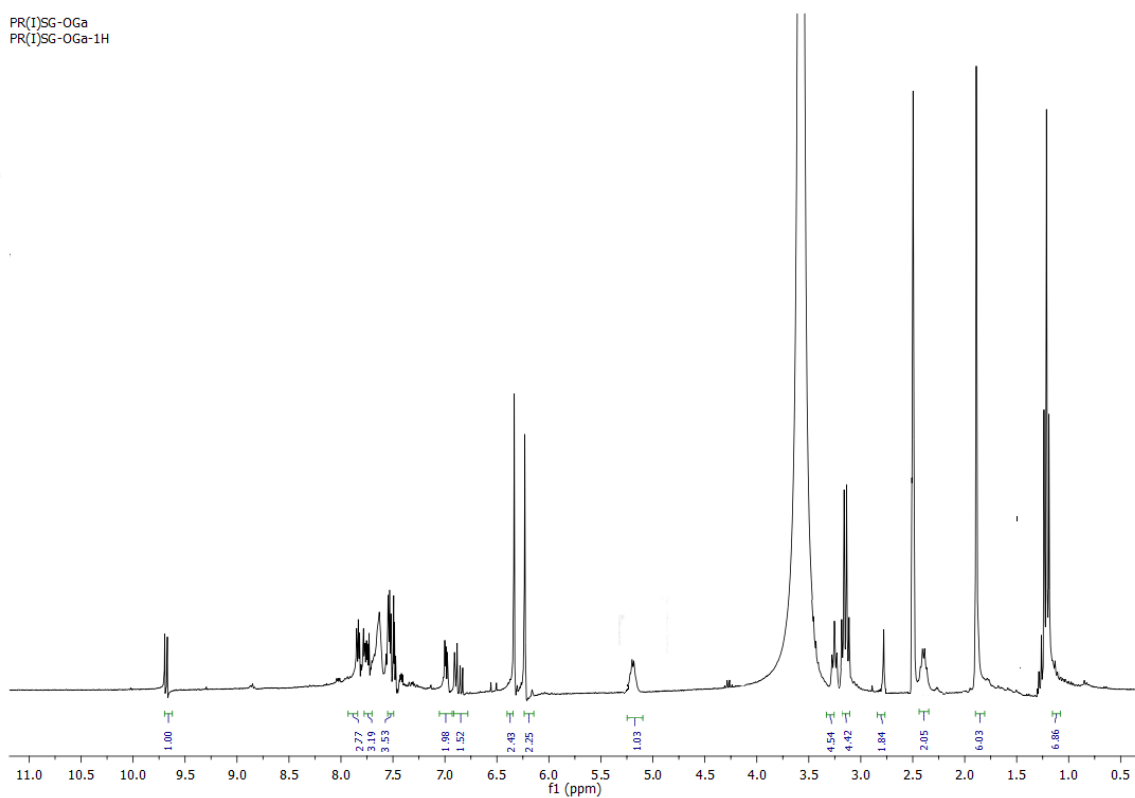

**Fig. S15**  $^1\text{H}$  NMR spectra of HL-CIN in the presence of  $\text{Ga}^{3+}$  in  $\text{DMSO-d}_6$ .

PR(1)SG-In3+  
PR(1)SG-In3+-1H

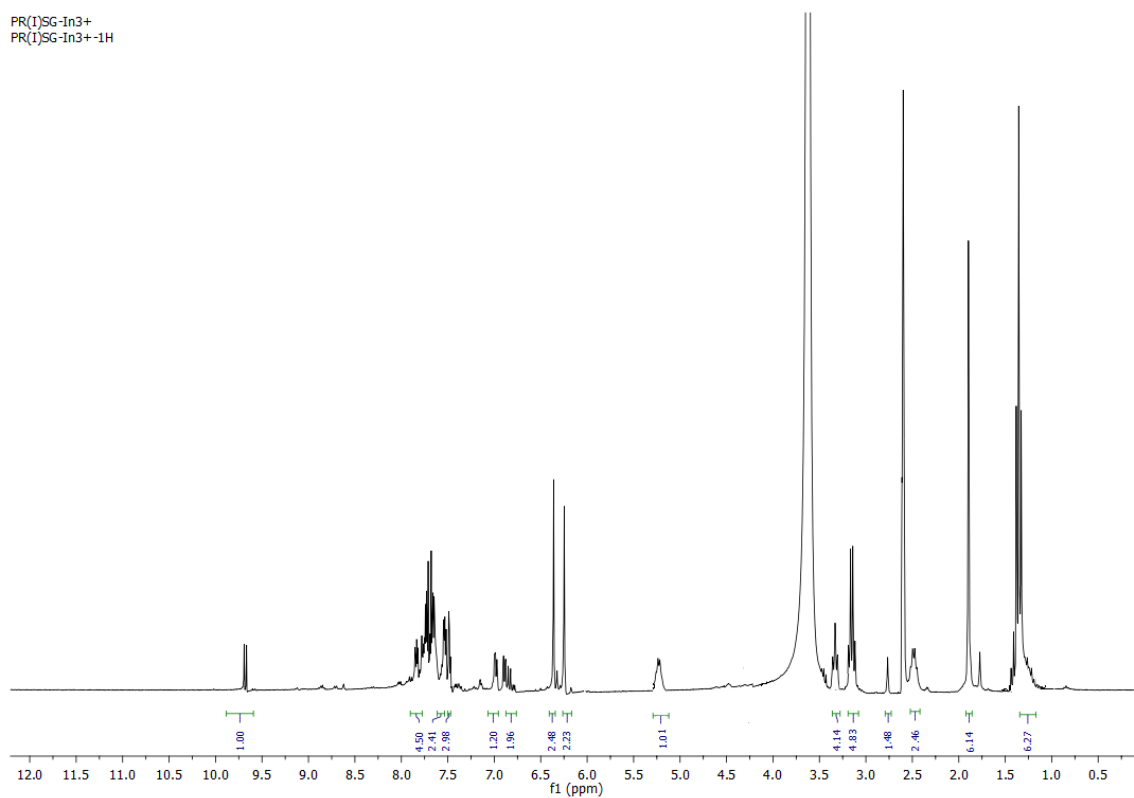

**Fig. S16**  $^1\text{H}$  NMR spectra of HL-CIN in the presence of  $\text{In}^{3+}$  in  $\text{DMSO-d}_6$ .

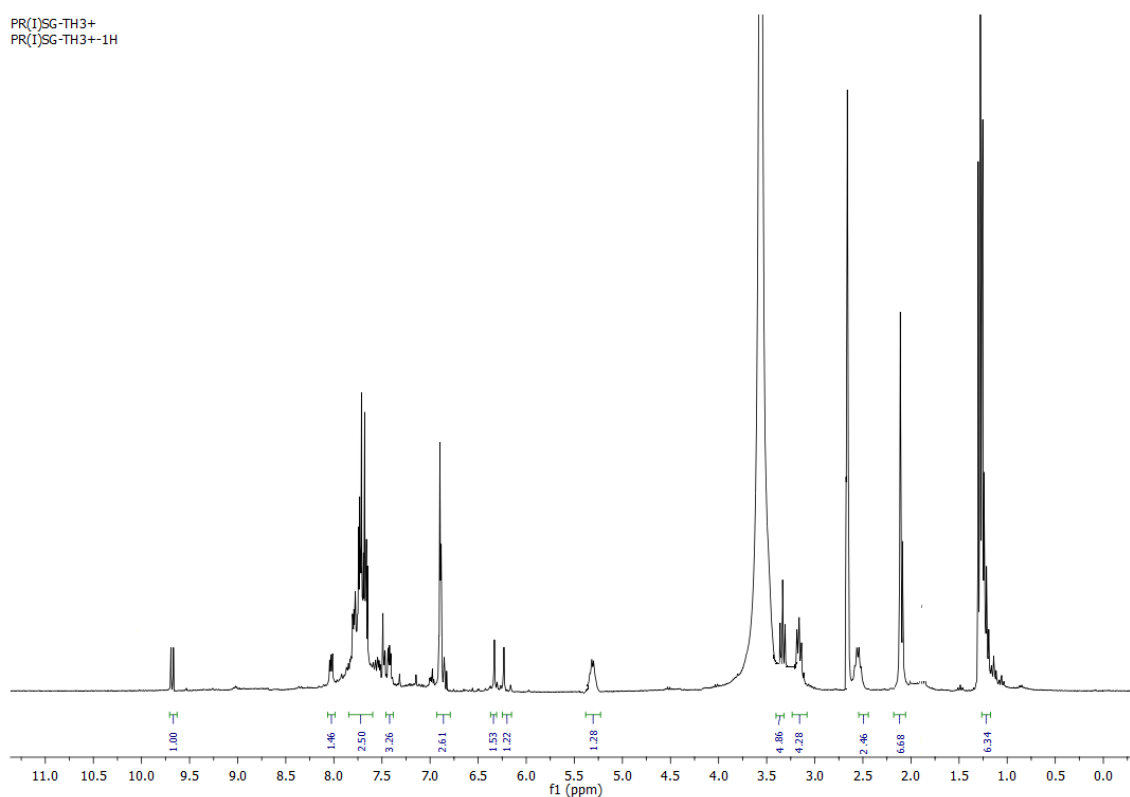

Fig. S17  $^1\text{H}$  NMR spectra of HL-CIN in the presence of  $\text{Ti}^{3+}$  in  $\text{DMSO-d}_6$ .

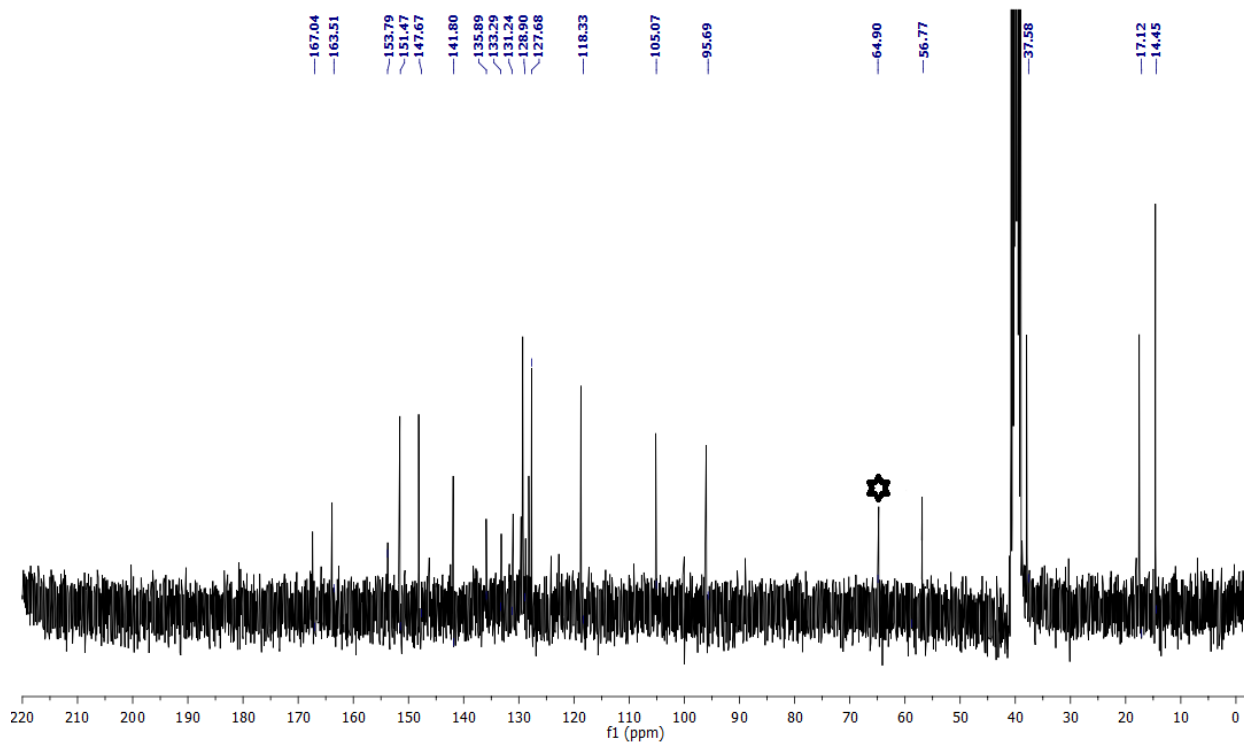

Fig. S18  $^{13}\text{C}$  NMR spectrum of f HL-CIN in  $\text{DMSO-d}_6$ .

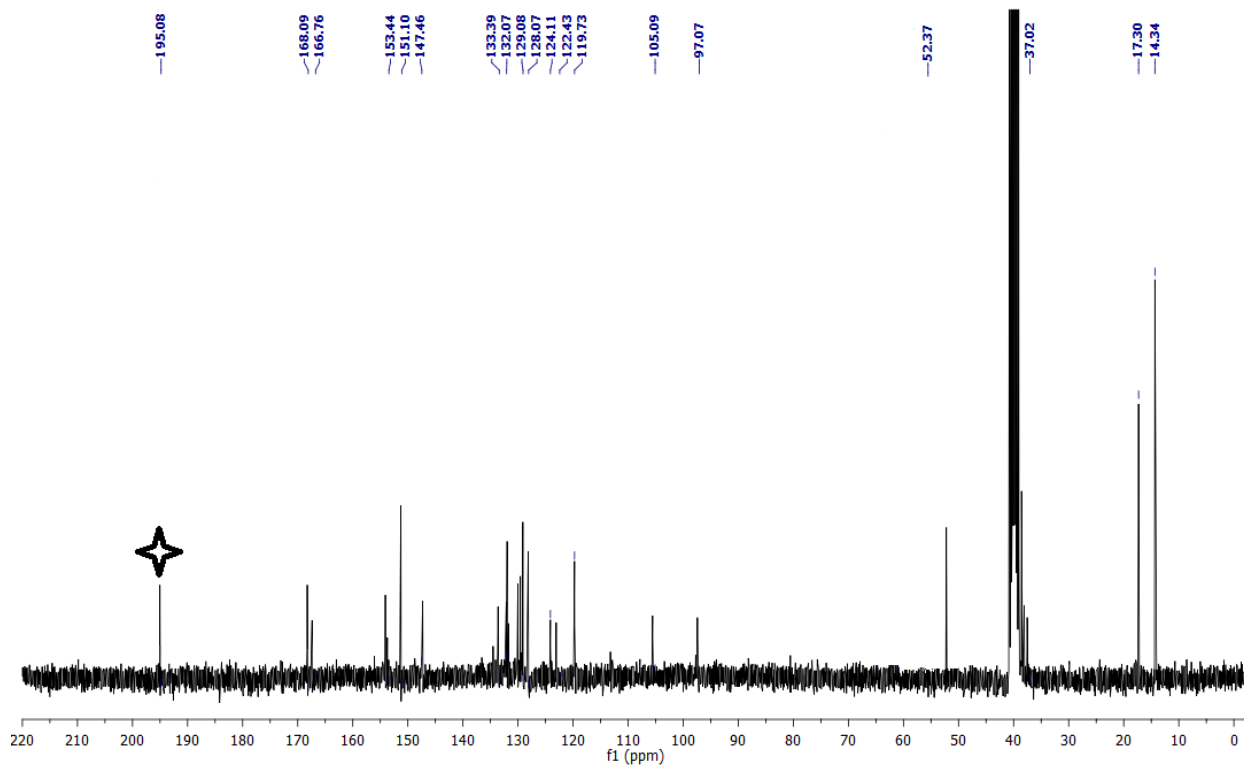

**Fig. S19**  $^{13}\text{C}$  NMR spectrum of HL-CIN in the presence of  $\text{Al}^{3+}$  in  $\text{DMSO-d}_6$ .

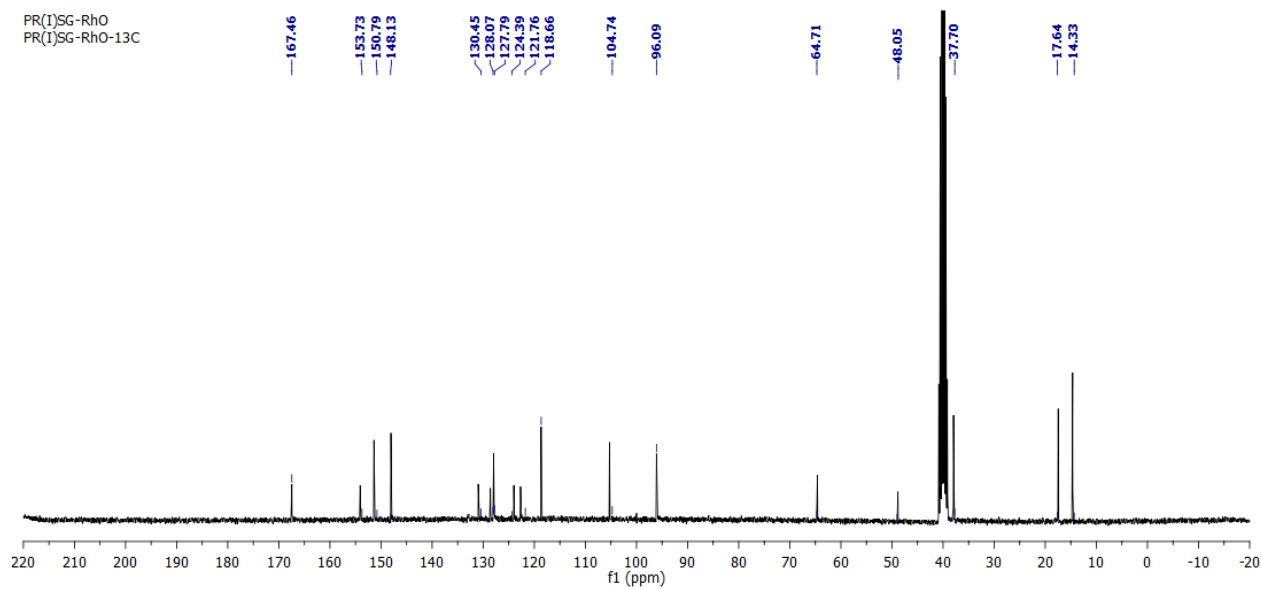

**Fig. S20**  $^{13}\text{C}$  NMR spectrum of  $\text{L}_1$  in  $\text{DMSO-d}_6$ .

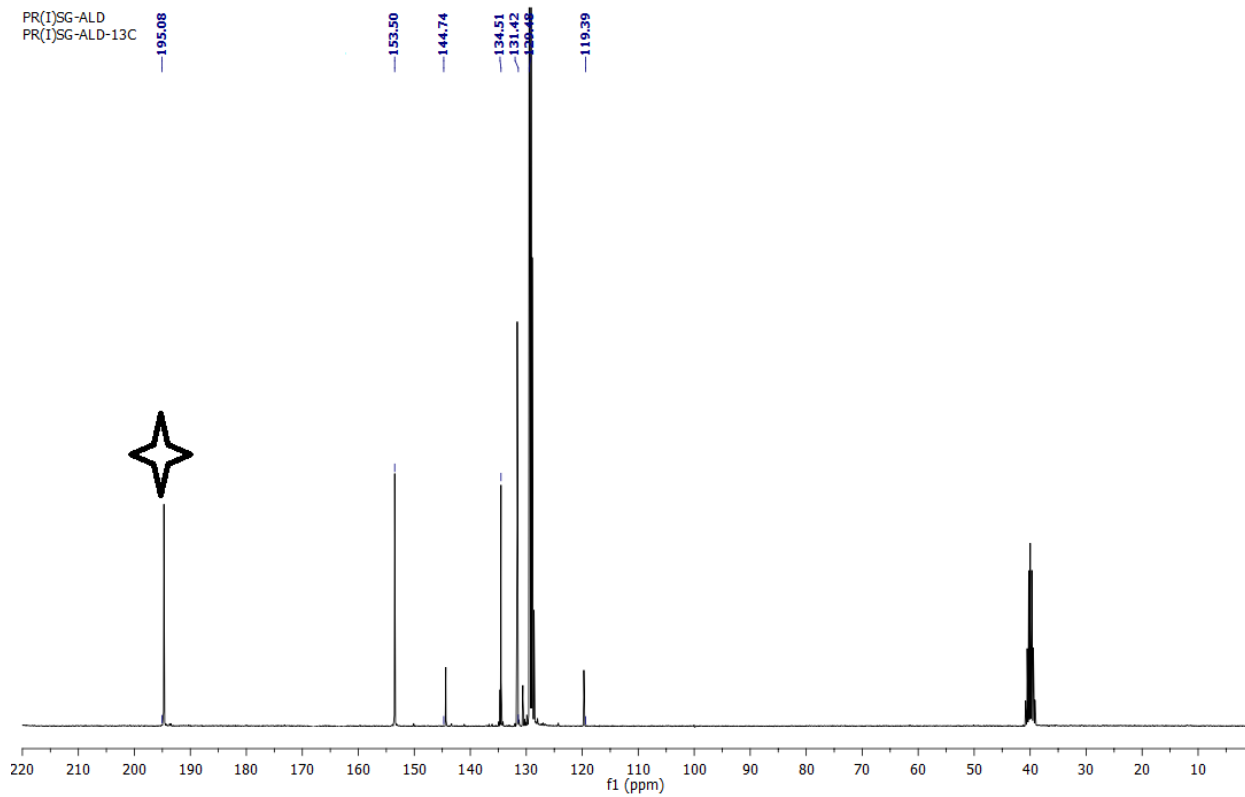

**Fig. S21**  $^{13}\text{C}$  NMR spectrum of *trans* cinnamaldehyde in  $\text{DMSO-d}_6$ .

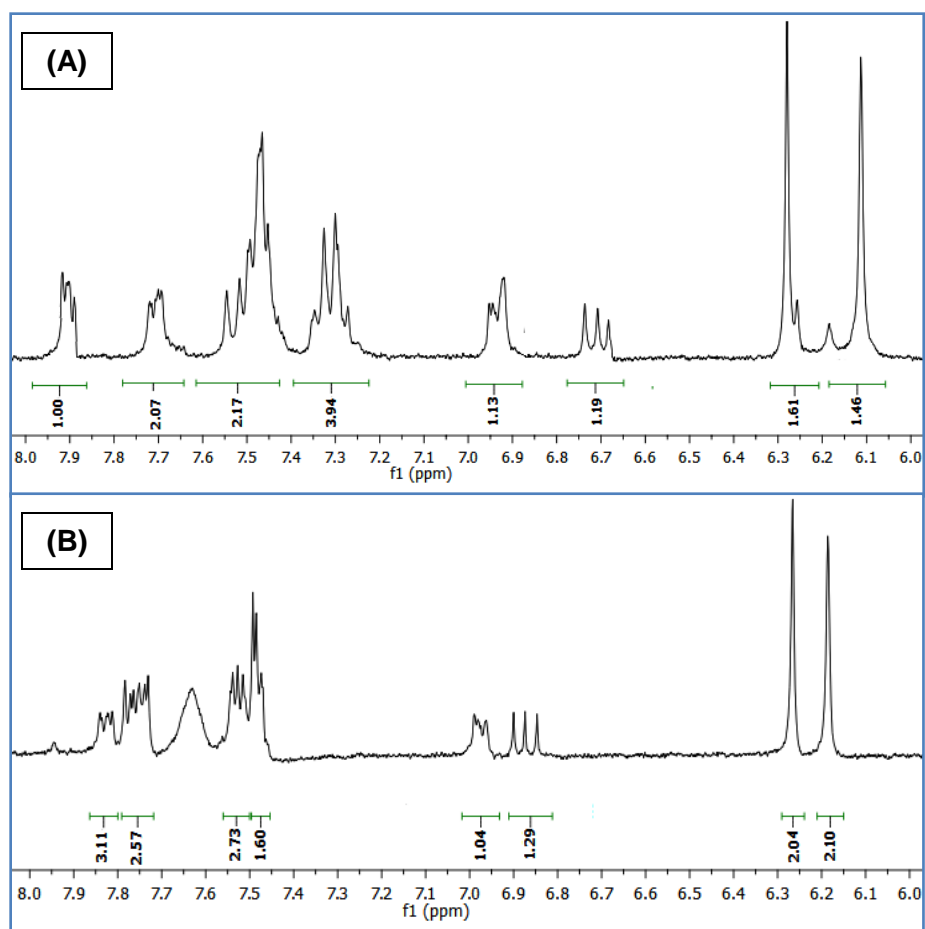

**Fig. S22**  $^1\text{H}$  NMR spectra of (A) HL-CIN and (B) HL-CIN in the presence of  $\text{Al}^{3+}$  showing the aromatic region in  $\text{DMSO-d}_6$ .

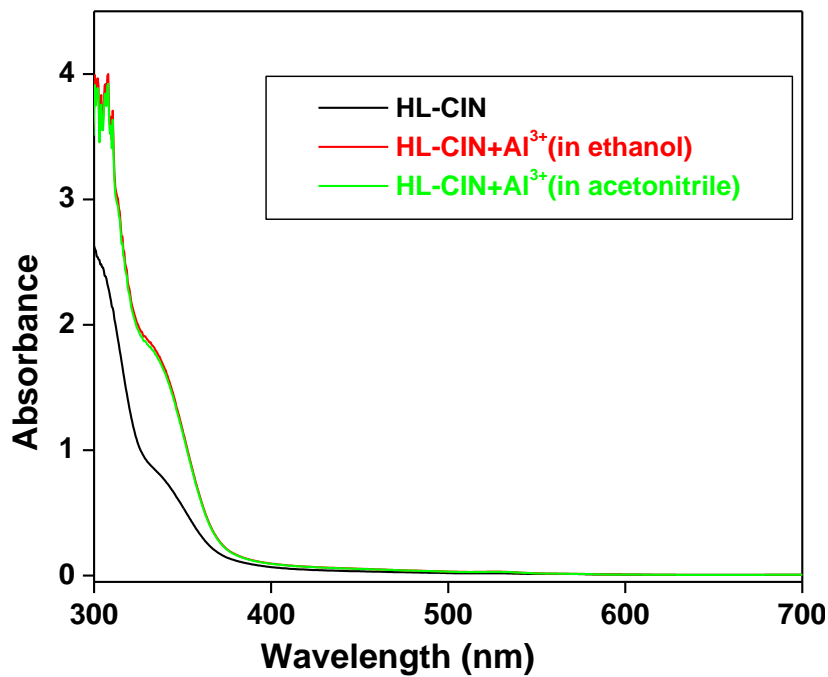

**Fig. S23** Absorption spectra of HL-CIN (40  $\mu\text{M}$ ) in the presence of 40  $\mu\text{M}$  of  $\text{Al}^{3+}$  ions in ethanol and acetonitrile at room temperature.

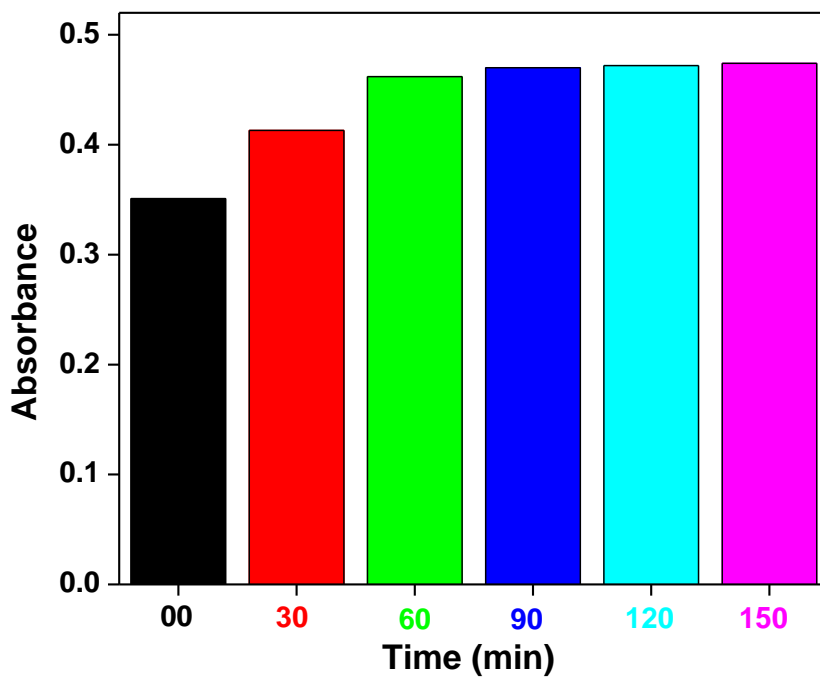

**Fig. S24** Absorption spectra of HL-CIN (40  $\mu\text{M}$ ) in the presence of one equivalent  $\text{Al}^{3+}$  in 10 mM HEPES buffer in  $\text{H}_2\text{O}/\text{CH}_3\text{OH} = 1:9$  (v/v; pH = 7.4) at room temperature in various time intervals.

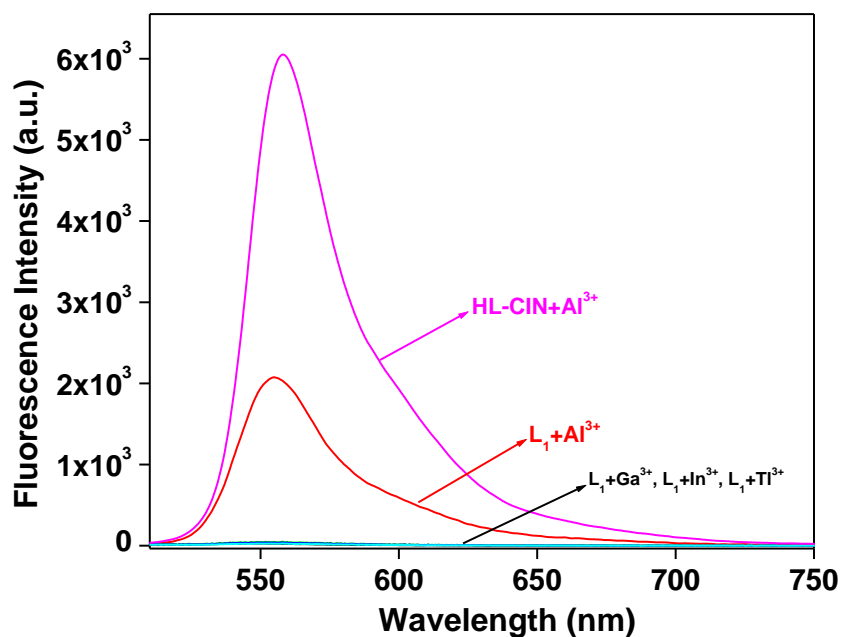

**Fig. S25** Fluorescence spectra of L<sub>1</sub> in the presence of Al<sup>3+</sup>, Ga<sup>3+</sup>, In<sup>3+</sup> and Tl<sup>3+</sup> ions. Fluorescence spectrum of HL-CIN is given as a reference for comparison in changes in fluorescence intensity under the same experimental conditions.

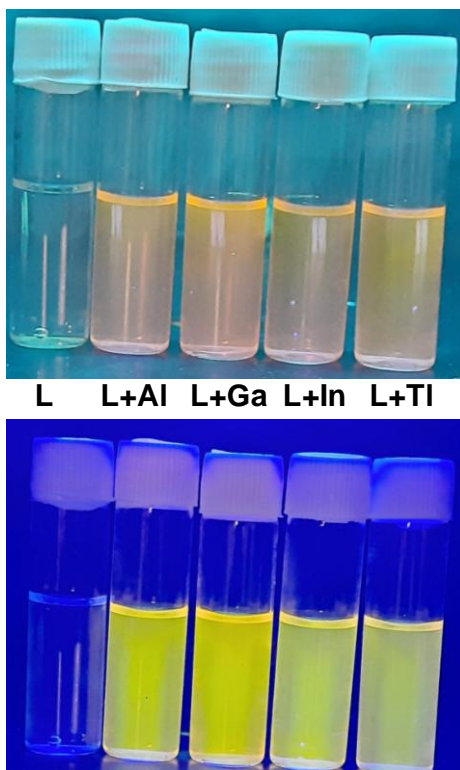

**Fig. S26** Color of HL-CIN and HL-CIN in the presence of one equivalent of Group 13 metal ions in river water:ethanol (1:9, v/v) under visible light (upper row) and UV radiation (lower row).



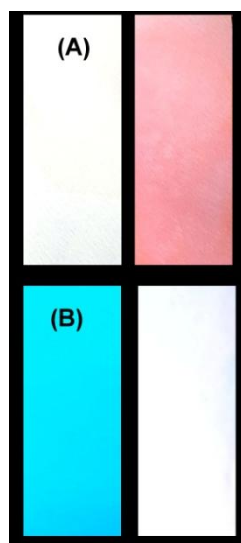

**Fig. S27** Color of HL-CIN in and HL-CIN with saloon waste water under visible light (upper row, (A)) and UV radiation (lower row, (B)).

**Table S2** Different parameters of recently published chemosensors for various metal ions.

| Entry no. | Probes                                                                              | Excitation (nm)/ Emission (nm) | LOD                     | Binding constant ( $K_a$ ) ( $M^{-1}$ ) | Sensor for              | Hydrolysis of occur? | Ref. |
|-----------|-------------------------------------------------------------------------------------|--------------------------------|-------------------------|-----------------------------------------|-------------------------|----------------------|------|
| 1         | 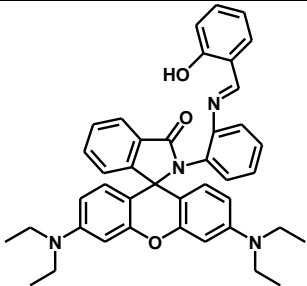   | 400/592                        | 1.84 $\mu$ M            | $4.39 \times 10^4$                      | $Al^{3+}$               | No                   | 43   |
| 2         |    | 525/585                        | 3.52 nM                 | ---                                     | $Ga^{3+}$ and $Hg^{2+}$ | Yes                  | 44   |
| 3         |   | 510/580                        | $1.60 \times 10^{-7}$ M | $6.9 \times 10^4$                       | $Al^{3+}$               | No                   | 45   |
| 4         |  | 520/573                        | $9.7 \times 10^{-8}$ M  | ---                                     | $Hg^{2+}$               | Yes                  | 46   |

|   |                                                                                    |         |                           |                                         |                                       |     |    |
|---|------------------------------------------------------------------------------------|---------|---------------------------|-----------------------------------------|---------------------------------------|-----|----|
| 5 | 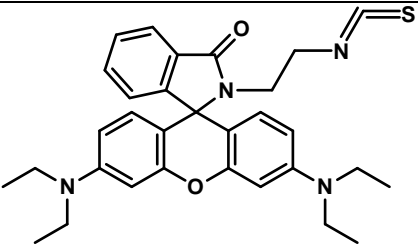  | 554/583 | 11 nM (Al <sup>3+</sup> ) | 4.5×10 <sup>4</sup> (Al <sup>3+</sup> ) | Al <sup>3+</sup> and Hg <sup>2+</sup> | No  | 47 |
| 6 |   | 560/588 | 1.51 μM                   | ---                                     | Au <sup>3+</sup>                      | Yes | 48 |
| 7 |   | 525/580 | 3.15 ×10 <sup>-7</sup> M  | ---                                     | Au <sup>3+</sup>                      | No  | 49 |
| 8 |  | 500/594 | 8.5 nM                    | ---                                     | Hg <sup>2+</sup>                      | Yes | 50 |

|    |                                                                                    |                                                                  |                                                                                                |                                                                                                                                        |                                                             |    |    |
|----|------------------------------------------------------------------------------------|------------------------------------------------------------------|------------------------------------------------------------------------------------------------|----------------------------------------------------------------------------------------------------------------------------------------|-------------------------------------------------------------|----|----|
| 9  | 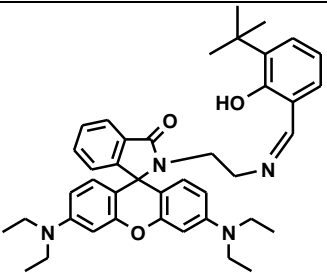  | 500/550<br>(Al <sup>3+</sup> )<br>370/457<br>(Zn <sup>2+</sup> ) | 1.10 × 10 <sup>-8</sup> M (Al <sup>3+</sup> )<br>7.69 × 10 <sup>-8</sup> M (Zn <sup>2+</sup> ) | 9.38 × 10 <sup>3</sup> (Al <sup>3+</sup> )<br>4.75 × 10 <sup>4</sup> (Zn <sup>2+</sup> )                                               | Al <sup>3+</sup><br>And Zn <sup>2+</sup>                    | No | 35 |
| 10 |   | 500/550                                                          | 6.97 nM (Al <sup>3+</sup> )<br>15.80 nM (Cr <sup>3+</sup> )<br>14.00 nM (Fe <sup>3+</sup> )    | 1.47 × 10 <sup>5</sup> (Al <sup>3+</sup> )<br>6.24 × 10 <sup>4</sup> (Cr <sup>3+</sup> )<br>8.74 × 10 <sup>4</sup> (Fe <sup>3+</sup> ) | Al <sup>3+</sup> , Cr <sup>3+</sup><br>and Fe <sup>3+</sup> | No | 36 |
| 11 |   | ---/559 (Al <sup>3+</sup> )                                      | 5.72 × 10 <sup>-7</sup> M (Al <sup>3+</sup> )                                                  | 1.4 × 10 <sup>4</sup> (Al <sup>3+</sup> )                                                                                              | Al <sup>3+</sup> and<br>Cu <sup>2+</sup>                    | No | 51 |
| 12 |  | 500/550 (for<br>Al <sup>3+</sup> )                               | 1.83 × 10 <sup>-7</sup> M (Al <sup>3+</sup> )                                                  | 9.02 × 10 <sup>4</sup> (Al <sup>3+</sup> )                                                                                             | Al <sup>3+</sup> and<br>Zn <sup>2+</sup>                    | No | 52 |

|     |                                                                                    |         |                                                                                                                                                                                          |                                                                                                                                                                       |                                                                                |     |                  |
|-----|------------------------------------------------------------------------------------|---------|------------------------------------------------------------------------------------------------------------------------------------------------------------------------------------------|-----------------------------------------------------------------------------------------------------------------------------------------------------------------------|--------------------------------------------------------------------------------|-----|------------------|
| 13  | 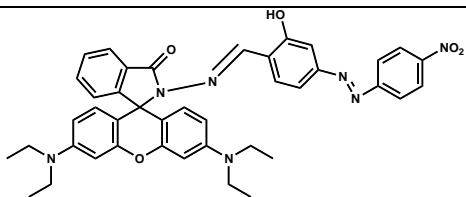  | 500/582 | $1.10 \times 10^{-7}$ M                                                                                                                                                                  | $7.033 \times 10^3$                                                                                                                                                   | Al <sup>3+</sup>                                                               | No  | 53               |
| 14  |   | 535/576 | $1.2 \times 10^{-8}$ M                                                                                                                                                                   | -                                                                                                                                                                     | Hg <sup>2+</sup>                                                               | No  | 54               |
| 15  |   | 500/550 | 6.54 nM (Al <sup>3+</sup> )<br>16.0 nM (Hg <sup>2+</sup> )                                                                                                                               | $4.44 \times 10^4$ (Al <sup>3+</sup> )<br>$4.51 \times 10^4$ (Hg <sup>2+</sup> )                                                                                      | Al <sup>3+</sup> and<br>Hg <sup>2+</sup>                                       | No  | 37               |
| 16. |   | 495/555 | $2.66 \times 10^{-8}$ M (Al <sup>3+</sup> )<br>$10.4 \times 10^{-8}$ M (Ga <sup>3+</sup> )<br>$8.19 \times 10^{-8}$ M (In <sup>3+</sup> )<br>$3.10 \times 10^{-8}$ M (Tl <sup>3+</sup> ) | $5.01 \times 10^4$ (Al <sup>3+</sup> )<br>$4.79 \times 10^4$ (Ga <sup>3+</sup> )<br>$4.57 \times 10^4$ (In <sup>3+</sup> )<br>$5.75 \times 10^4$ (Tl <sup>3+</sup> ), | Al <sup>3+</sup> , Ga <sup>3+</sup> ,<br>In <sup>3+</sup> and Tl <sup>3+</sup> | No  | 13               |
| 17  |  | 495/558 | $2.8 \times 10^{-8}$ M (Al <sup>3+</sup> )<br>$2.9 \times 10^{-8}$ M (Ga <sup>3+</sup> )<br>$5.6 \times 10^{-8}$ M (In <sup>3+</sup> )<br>$8.2 \times 10^{-8}$ M (Tl <sup>3+</sup> )     | ---                                                                                                                                                                   | Al <sup>3+</sup> , Ga <sup>3+</sup> ,<br>In <sup>3+</sup> and Tl <sup>3+</sup> | Yes | Present<br>study |

## References

- S1 J.-S. Wu, I.-C. Hwang, K. S. Kim, J. S. Kim *Org. Lett.* 9 (2007) 907.
- S2 D. D. Perrin, W. L. F. Armarego and D. R. Perrin, *Purification of Laboratory Chemicals*, Pergamon Press, Oxford, UK, 1980.
- S3 A. M. Brouwer, *Pure Appl. Chem.* 83 (2011) 2213.
- S4 V. Thomsen, D. Schatzlein, D. Mercurio, *Spectroscopy* 18 (2003) 112.
